# Supplementary material
Source: publisher figshare collection journal article supplement (https://gsajournals.figshare.com/ndownloader/files/24280499)
Supplement: Supplementary file 1 [file 24280499]

## Sheet: Genomic regions under selection
File S4 List of 40 SNPs (loci) presenting evidence of selection among six Ethiopian sorghum subgroups, and candidate genes located in the vicinity of these SNPs
SNP Id	Chr:Position (bp)	fst	qval (FDR)	log10qvalue	alpha	Gene name (v3.1)	Chr:Start-End (bp)	Annotation
S1_3425303	1:3425303	0.37418	0.041628	-1.38061	1.1677	Sobic.001G044700	1:3324801-3325349	similar to Putative uncharacterized protein
S2_11766079	2:11766079	0.40694	0.029641	-1.52811	1.3266	Sobic.002G102066	2: 11,670,684-11,672,670	Ortholog of OsLOGL9/Lysine decarboxylase-like protein, Response to abiotic stresse
S2_11868185	2:11868185	0.39894	0.038023	-1.41995	1.287	Sobic.002G102900	2: 11,956,981-11,958,721	Cytokinin riboside 5'-monophosphate phosphoribohydrolase LOG5, hormone biosynthetic process
S2_12100705	2:12100705	0.44555	0.0060012	-2.22176	1.5155	Sobic.002G103500	2: 12,157,805-12,161,837	Ras-related protein RABA1D
S2_12105195	2:12105226	0.3896	0.045221	-1.34466	1.2384	Sobic.002G103200	2:12004665-12005837	Uncharacterized protein
S2_12160831	2:12160831	0.43379	0.016432	-1.78431	1.4561	Sobic.002G103500	2: 12,157,805-12,161,837	ADP ribosylation factor
S2_12160847	2:12160847	0.435	0.01527	-1.81616	1.463	Sobic.002G103500	2: 12,157,805-12,161,837	similar to Ras-related protein Rab11C
S2_12249074	2:12249074	0.40079	0.036491	-1.43781	1.2956	Sobic.002G103600	2: 12,162,887-12,165,971	Glycosyl transferase
S2_67505120	2:67505120	0.40107	0.037279	-1.42854	1.2966	Sobic.002G297900	2:67403063-67405260	Iron-binding zinc finger CDGSH type
S3_11045259	3:11045259	0.40455	0.049092	-1.30899	1.308	Sobic.003G120600	3: 10,961,561-10,967,016	Ortholog of OsGT1/Glycosyltransferase 1, Pollen wall formation
						Sobic.003G121400	3: 11,065,634-11,069,607	Dof domain, zinc finger
S3_60642776	3:60642776	0.4082	0.047577	-1.3226	1.3261	Sobic.003G268900	3: 60,572,698-60,575,521	Ortholog of Os01g0700900/Strigolacton biosynthesis gene 1
						Sobic.003G269600	3: 60,633,944-60,636,136	cytochrome P450, putative, expressed
						Sobic.003G270600	3: 60,727,143-60,735,273	adaptor complexes medium subunit family domain containing protein, expressed
S3_64376276	3:12105195	0.38863	0.038771	-1.41149	1.2387	Sobic.003G129400	3:12102873-12107826	similar to Glycosyltransferase
S4_1121705	4:1121705	0.047851	0.046021	-1.33704	-1.7252	Sobic.004G012300	4:1019939-1026858	Asparaginase / L-asparagine amidohydrolase
S4_53331810	4:53331810	0.41729	0.036491	-1.43781	1.3727	Sobic.004G179400	4:53230602-53236478	similar to Ferrochelatase-2, chloroplast precursor
S4_62557603	4:62557603	0.3645	0.043496	-1.36155	1.1234	Sobic.004G282700	4:62454702-62458057	similar to DTDP-D-glucose 4,6-dehydratase-like/expressed
S5_18641230	5:18641230	0.41124	0.018004	-1.74463	1.3505	Sobic.005G104100	5: 18,542,343-18,544,975	similar to Os11g0210100 protein
S5_18660449	5:18660449	0.40212	0.025636	-1.59115	1.306	Sobic.005G104300	5: 18,636,378-18,638,698	Uncharacterized protein
S5_18661601	5:18661601	0.39055	0.046815	-1.32961	1.2438	Sobic.005G104200	5: 18,627,572-18,632,413	similar to Aminotransferase, putative
S5_18663810	5:18663810	0.39092	0.04257	-1.3709	1.2463	Sobic.005G104300	5: 18,636,378-18,638,698	Uncharacterized protein
S5_3030678	5:3030678	0.44872	0.0073015	-2.13659	1.5298	Sobic.005G032800	5:2929954-2936555	similar to Putative splicing factor
						Sobic.005G033801	5: 3,055,094-3,056,533	similar to Flavonol 3-O-glucosyltransferase, putative, expressed, anthocyanin biosynthesis
						Sobic.005G034400	5: 3,093,226-3,098,475	similar to Pyruvate kinase
S5_3724645	5:3724645	0.40773	0.023077	-1.63682	1.3315	Sobic.005G040900	5: 3,714,390-3,719,837	Ring Zinc finger protein/expressed
						Sobic.005G041200	5: 3,788,776-3,790,505	F-BOX protein related
S5_3724647	5:3724647	0.40782	0.027672	-1.55796	1.3321	Sobic.005G041300	5: 3,811,229-3,815,834	AMINO ACID TRANSPORTER
S5_4429871	5:4429871	0.43605	0.013803	-1.86003	1.4674	Sobic.005G045800	5: 4,344,430-4,347,212	Serine/Threonin-protein kinase/expressed
S5_56265060	5:56265060	0.41033	0.021484	-1.66788	1.3431	Sobic.005G129700	5: 56,173,625-56,176,771	similar to NAD dependent epimerase/dehydratase family protein, expressed, abscisic acid biosynthesis
S6_366828	6:366828	0.41018	0.030773	-1.51183	1.3413	Sobic.006G002600	6: 454,825-458,486	Ortholog of OsGT43H, Glycosyl transferase family 43 protein
S7_31085348	7:31085348	0.045946	0.039715	-1.40105	-1.7752	Sobic.007G103500	7: 31,733,217-31,734,046	Uncharacterized protein
S7_3191870	7:3191870	0.38477	0.028706	-1.54203	1.2232	Sobic.007G035000	7: 3,116,133-3,117,385	similar to Tryptophan decarboxylase/expressed, serotonin and melatonin biosynthesis
S7_56063576	7:56063576	0.41074	0.048325	-1.31583	1.3378	Sobic.007G135301	7: 56,046,249-56,061,908	MADS box transcription factor family
S8_49001196	8:49001196	0.44739	0.026705	-1.57341	1.5174	Sobic.008G103200	8: 48,953,521-48,961,871	Ortholog of OsGRP6/Similar to Low temperature-responsive RNA-binding protein
						Sobic.008G103900	8: 49,064,316-49,067,582	RNA binding protein/expressed
S8_51058445	8:51058445	0.39871	0.034734	-1.45925	1.2861	Sobic.008G109650	8: 51,024,049-51,025,318	Uncharacterized protein
S8_52905189	8:52905189	0.39456	0.04984	-1.30242	1.2609	Sobic.008G117600	8: 52,821,183-52,824,493	Glutaredoxin-C9
S8_930787	8:930787	0.39406	0.033826	-1.47075	1.2638	Sobic.008G010200	8:828541-830880	Uncharacterized protein
S8_930803	8:930803	0.3872	0.044379	-1.35282	1.2282	Sobic.008G011400	8:930210-932510	similar to SPRY domain containing protein, expressed
S9_170263	9:170263	0.44132	0.011802	-1.92804	1.4922	Sobic.009G000900	9: 98,466-100,872	Gibbrellic acid methyltransferase 2
						Sobic.009G001600	9: 166,827-167,614	similar to Beta-kafirin precursor
S9_45055139	9:45055139	0.40457	0.019559	-1.70865	1.3187	Sobic.009G111901	9: 44,990,994-44,993,805	Uncharacterized protein
S9_50802959	9:50802959	0.38985	0.040643	-1.39101	1.2429	Sobic.009G152100	9: 50,839,684-50,842,676	basic leucine zipper transcription factor
S10_58022854	10:58022854	0.38531	0.024422	-1.61222	1.2279	Sobic.010G236400	10:57922238-57927595	Ubiquitin carboxyl-terminal hydrolase 37
S10_58345093	10:58345093	0.3995	0.033826	-1.47075	1.2901	Sobic.010G240700	10:58243600-58247504	similar to Putative uncharacterized protein
S10_58532130	10:58532130	0.42166	0.031827	-1.4972	1.3938	Sobic.010G243900	10: 58,474,320-58,480,965	similar to Adagio-like protein 1
						Sobic.010G244900	10: 58,507,618-58,512,060	Pentatricopeptide repeat-containing protein in mitochondrial-related
S10_58560610	10:58560610	0.4162	0.0087351	-2.05873	1.377	Sobic.010G243700	10: 58,460,151-58,461,094	Uncharacterized protein
